# Supplementary material
Source: Springer Nature journal article supplement (https://www.springermedizin.de/resource/supplementary/12986_2007_120_MOESM5_ESM.pdf/25655408)

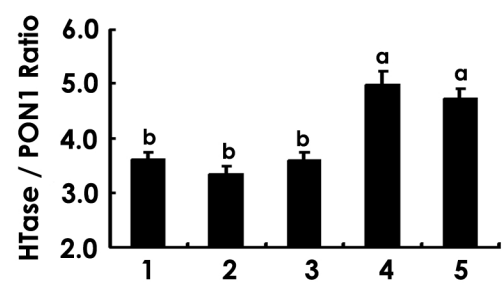

**Fig. 6**

Supplement: MOESM5 [file 25655408]
